# Supplementary material
Source: publisher site journal article supplement (https://www.dovepress.com/article/250440)
Supplement: Supplementary file 1 [file get_supplementary_file.php]

**Table S1 Back-translation, issues, and agreements for each Modified Gait Efficacy Scale item**

| **Original** | **Back-translation 1 (BT1)** | **Back-translation 2 (BT2)** | **Issues** | **Agreement** |
| --- | --- | --- | --- | --- |
| The Modified Gait Efficacy Scale | The Modified Gait Self-Efficacy Scale | The Modified Gait Efficacy Scale | Uncertainly whether word “self-efficacy” should be used. | “修订版步态效能感量表”  The most appropriate Chinese expression has been used. |
| How much confidence do you have that you would be able to safely walk on a level surface such as a hardwood floor? | How much confidence that you can walk safely on the horizontal ground? | How much confidence that you can able to safely walk on the level of the ground such as a hardwood floor? | Whether the phrase “such as a hardwood floor”should be add in the Chinese version. | “你有多大信心可以在水平地面上安全行走，如硬木地板？”  The Chinese version has been chosen to conform to the original version. |
| How much confidence do you have that you would be able to safely walk on grass? | How much confidence do you have that you would be able to safely walk on lawn? | How much confidence do you have that you would be able to walk safely on the grassland? | Chinese language has multiple expression for the word “grass”. | “你有多大信心可以到草地上安全行走？”  “Grass” is the most adequate translation in Chinese version. |
| How much confidence do you have that you would be able to safely walk over an obstacle in your path? | How much confidence do you have that you would be able to safely cross obstacles in walking? | How much confidence do you have that you would be able to safely pass through obstacles in the road? | Discussion how to translate into Chinese “walk over an obstacle in your path”. | “你有多大信心可以可以安全通过离上的障碍？”  The most appropriate Chinese word has been chosen. |
| How much confidence do you have that you would be able to safely step down from a curb? | How much confidence do you have that you would be able to safely walk down the steps? | How much confidence do you have that you would be able to safely step from a sidewalk? | Uncertainly how to translate into Chinese “from a curb”. | “你有多大信心可以安全地走下人行便道？”  Chinese translation is correct in terms of commonsense notion. |
| How much confidence do you have that you would be able to safely step up onto a curb? | How much confidence do you have that you would be able to safely step onto the shortcut? | How much confidence do you have that you would be able to safely walk on the sidewalk? | Discussion how to translate into Chinese “step up onto a curb”. | “你有多大信心可以安全地走上人行便道？”  The Chinese version meets Chinese language requirements without losing English implications. |
| How much confidence do you have that you would be able to safely walk up stairs if you are holding on to a railing? | How much confidence do you have that you would be able to safely upstairs with the aid of railing? | How much confidence do you have that you would be able to safely walk up stairs by the railing? | Discussion on the reasonable language expression in the Chinese version. | “你有多大信心可以借助栏杆安全地上楼梯？”  Ensure the consistency between the Chinese translation and the original text. |
| How much confidence do you have that you would be able to safely walk down stairs if you are holding on to a railing? | How much confidence do you have that you would be able to safely go downstairs using a railing? | How much confidence do you have that you would be able to safely walk down stairs with the railing? | Uncertainly how to translate into Chinese “if you are holding on to a railing”. | “你有多大信心借助栏杆安全地下楼梯？”  The most correct Chinese grammar and expression has been chosen. |
| How much confidence do you have that you would be able to safely walk up stairs if you are Not holding on a railing? | How much confidence do you have that you would be able to safely walk up stairs independently? | How much confidence do you have that you would be able to safely walk up stairs without the railing? | Whether the phrase “without the railing” replace the clause “if you are NOT holding on a railing”. | “你有多大信心可以不借助栏杆安全地上楼梯？”  A better picture of this question was chosen in the Chinese version. |
| How much confidence do you have that you would be able to safely walk down stairs if you are NOT holding on to a railing? | How much confidence do you have that you would be able to safely walk down stairs without a railing? | How much confidence do you have that you would be able to safely walk down stairs independently? | Discussion on the phrase choice between “without a railing” and “independently”. | “你有多大信心可以不借助栏杆安全地下楼梯？”  The most correct Chinese expression was chosen. |
| How much confidence do you have that you would be able to safely walk a long distance such as 1/2 mile? | How much confidence do you have that you would be able to safely walk a long distance such as 800 meters? | How much confidence do you have that you would be able to safely walk a long distance such as 800 meters? | Whether the phrase “800 meters” replace “1/2 mile”. | “你有多大信心可以安全地进行长距离散步，如800米？”  The most adequate Chinese version was chosen. |
